# Supplementary material for: Bioactive Secondary Metabolites from Trichoderma spp. against Phytopathogenic Bacteria and Root-Knot Nematode
Source: PubMed Central journal article supplement (PMC7143365; doi:10.3390/microorganisms8030401), 2020-03-13
Supplement: microorganisms-08-00401-s001.pdf [file microorganisms-08-00401-s001.pdf]

### Supplementary Table

**Table S1.** Composition of five growth media used for the production of secondary metabolites.

| <b>Ingredients</b>                              | <b>Amount (g)/L</b> |
|-------------------------------------------------|---------------------|
| <b>(1) MMK2</b>                                 |                     |
| Mannitol                                        | 40.0                |
| Yeast extract                                   | 5.0                 |
| Mrashuge & Skoog salts                          | 4.3                 |
| <b>(2) STP</b>                                  |                     |
| Sucrose                                         | 75.0                |
| Tomato paste                                    | 10.0                |
| Malt extract                                    | 5.0                 |
| (NH <sub>4</sub> ) <sub>2</sub> SO <sub>4</sub> | 1.0                 |
| Soy flour                                       | 1.0                 |
| KH <sub>2</sub> PO <sub>4</sub>                 | 9.0                 |
| <b>(3) MOF</b>                                  |                     |
| Mannitol                                        | 75.0                |
| Oat flour                                       | 15.0                |
| Yeast Extract                                   | 5.0                 |
| L-glutamic acid                                 | 4.0                 |
| MES                                             | 16.2                |
| <b>(4) Supermalt (SuM)</b>                      |                     |
| Malt extract                                    | 50.0                |
| Yeast extract                                   | 10.0                |
| FeSO <sub>4</sub> · 7H <sub>2</sub> O           | 20.0                |
| ZnSO <sub>4</sub> · 7H <sub>2</sub> O           | 7.0                 |
| <b>(5) Wheat Solid*</b>                         |                     |
| Wheat                                           | 30 g                |

\*For the preparation of Wheat solid media, 50 ml base liquid media (Yeast autolsate 2.0 g, Sodium tartrate 10.0 g, KH<sub>2</sub>PO<sub>4</sub> 1.0 g, MgSO<sub>4</sub> · 7H<sub>2</sub>O 1.0 g, FeSO<sub>4</sub> · 7H<sub>2</sub>O 1.0 g/L) was poured on 30 g wheat in 500 ml flask.
